# Supplementary material for: COVID-19 Prevalence among Healthcare Workers. A Systematic Review and Meta-Analysis
Source: MDPI journal article supplement (doi:10.3390/ijerph19010146), 2021-12-23

**Supplementary File S3: Distribution of COVID-19 burden among health care  
workers in included studies**

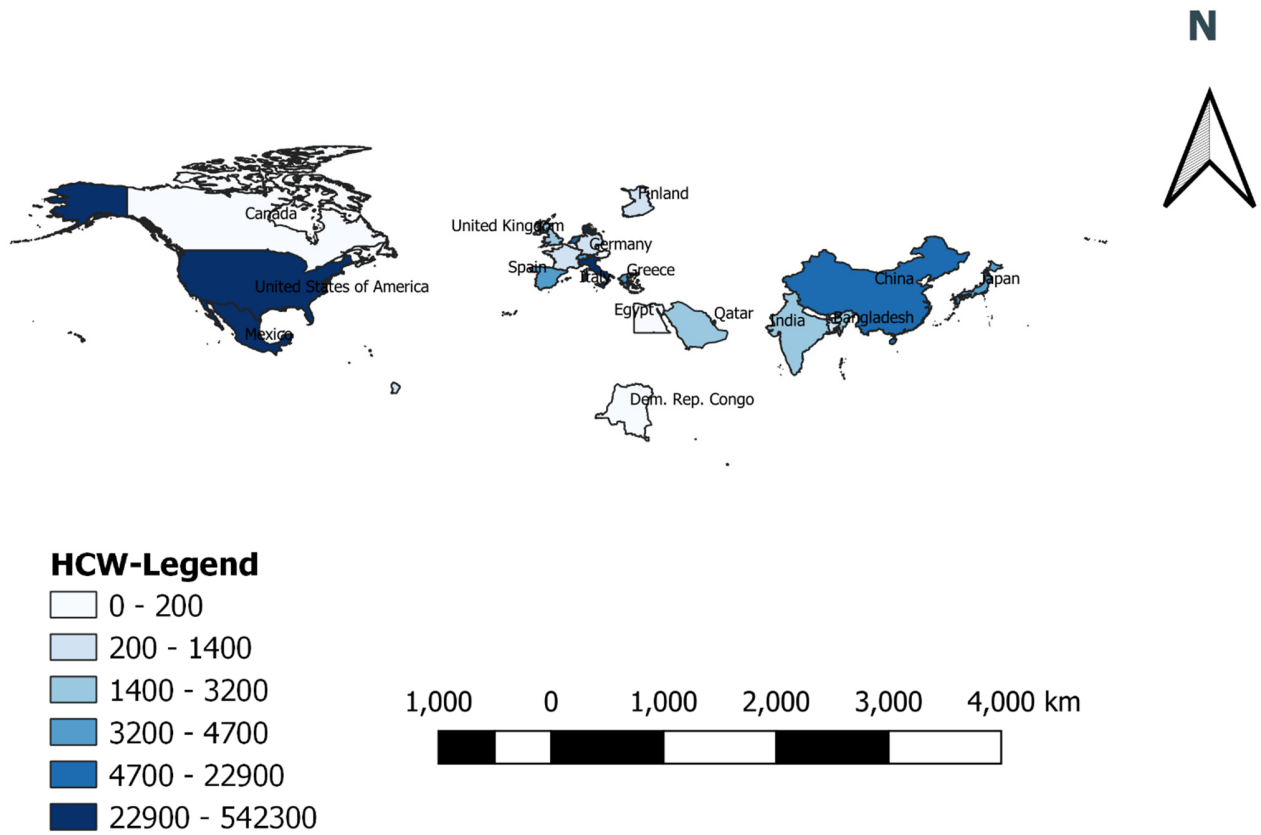

Supplement: s1 [file s1]
