# Supplementary material for: COVID-19 Prevalence among Healthcare Workers. A Systematic Review and Meta-Analysis
Source: MDPI journal article supplement (doi:10.3390/ijerph19010146), 2021-12-23
Supplement: s1 [file s1]

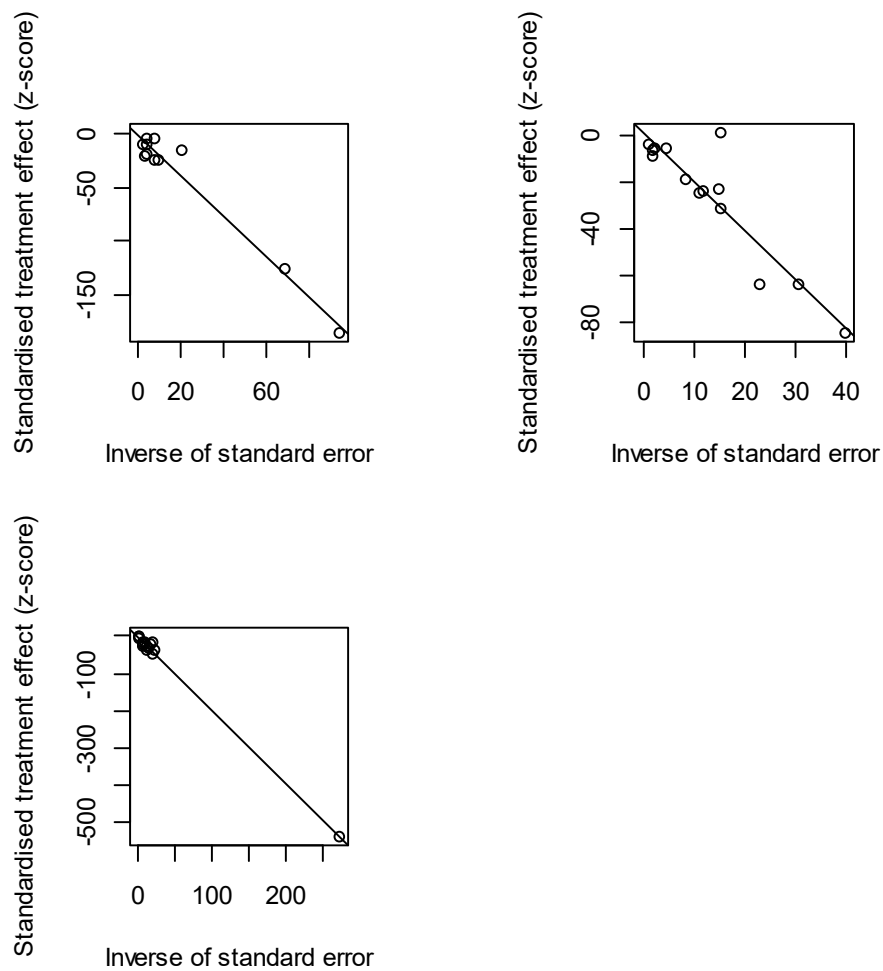

Supplementary File S5: Egger's plots for assessing the presence of publication bias for the meta-analysis of: 1). prevalence of COVID-19 among studies using the AB method of test (*left-top panel*); 2). prevalence of COVID-19 among studies using the PCR method of test (*right-top panel*); and 3). Incidence rate of COVID-19 among studies using the PCR method of test (*left-bottom panel*)
