# Supplementary material for: COVID-19 Prevalence among Healthcare Workers. A Systematic Review and Meta-Analysis
Source: MDPI journal article supplement (doi:10.3390/ijerph19010146), 2021-12-23
Supplement: s1 [file s1]

Supplementary File S6: Presentation of findings for assessing and accounting for small-study effects

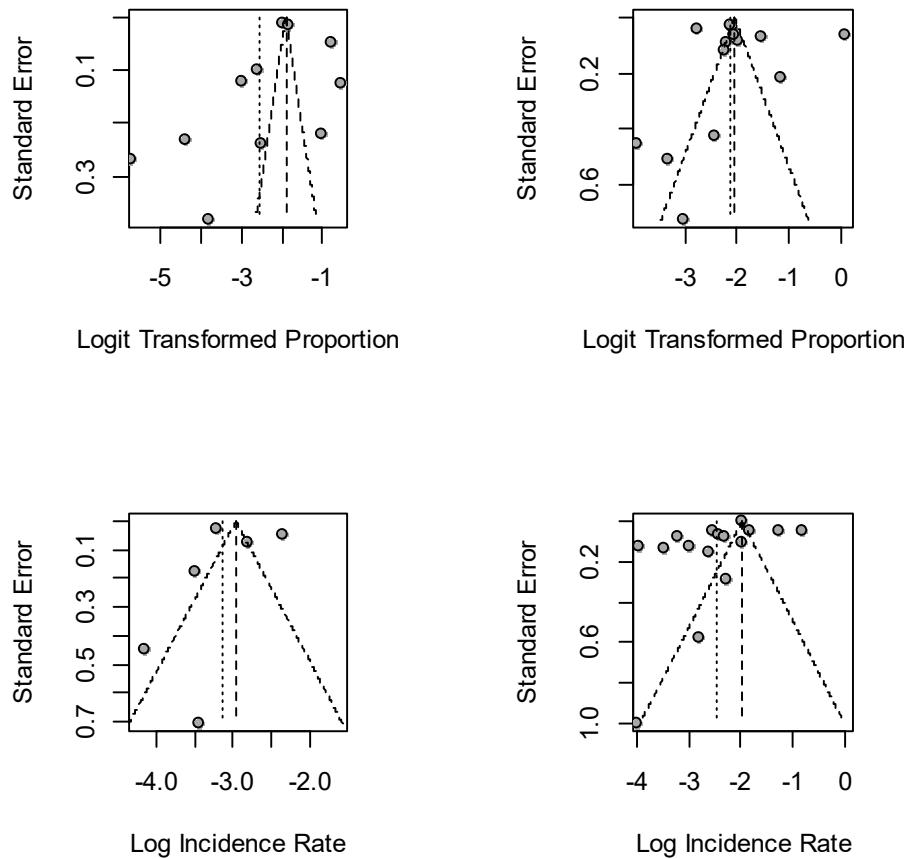

**Figure S1.** Funnel plots for assessing and accounting for small-study effects in the meta-analysis of: 1). prevalence of COVID-19 among studies using the AB method of test (*left-top panel*); 2). prevalence of COVID-19 among studies using the PCR method of test (*right-top panel*); 3). Incidence rate of COVID-19 among studies using the AB method of test (*left-bottom panel*); 2). Incidence rate of COVID-19 among studies using the PCR method of test; (*right-bottom panel*).

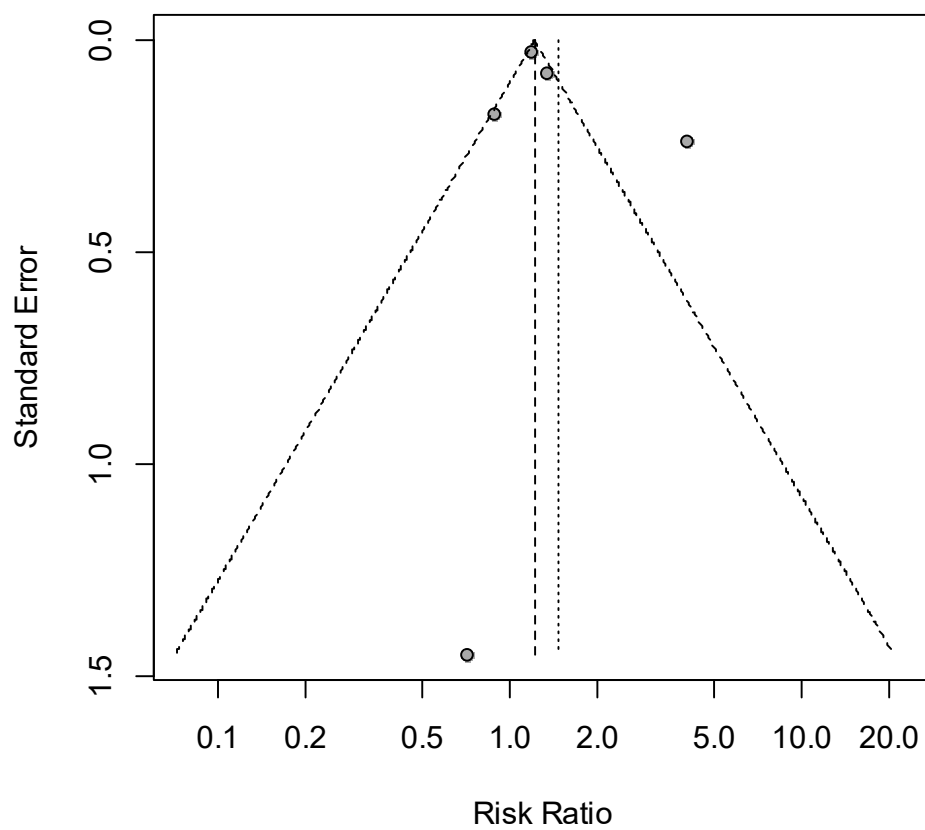

**Figure S2.** Funnel plots for assessing and accounting for small-study effects in the meta-analysis of risk of COVID-19 between patient and non-patient facing HCWs.
