# Supplementary figures and images for: COVID-19 Prevalence among Healthcare Workers. A Systematic Review and Meta-Analysis
Source: MDPI journal article supplement (doi:10.3390/ijerph19010146), 2021-12-23

# Supplementary File S1. PRISMA flow diagram

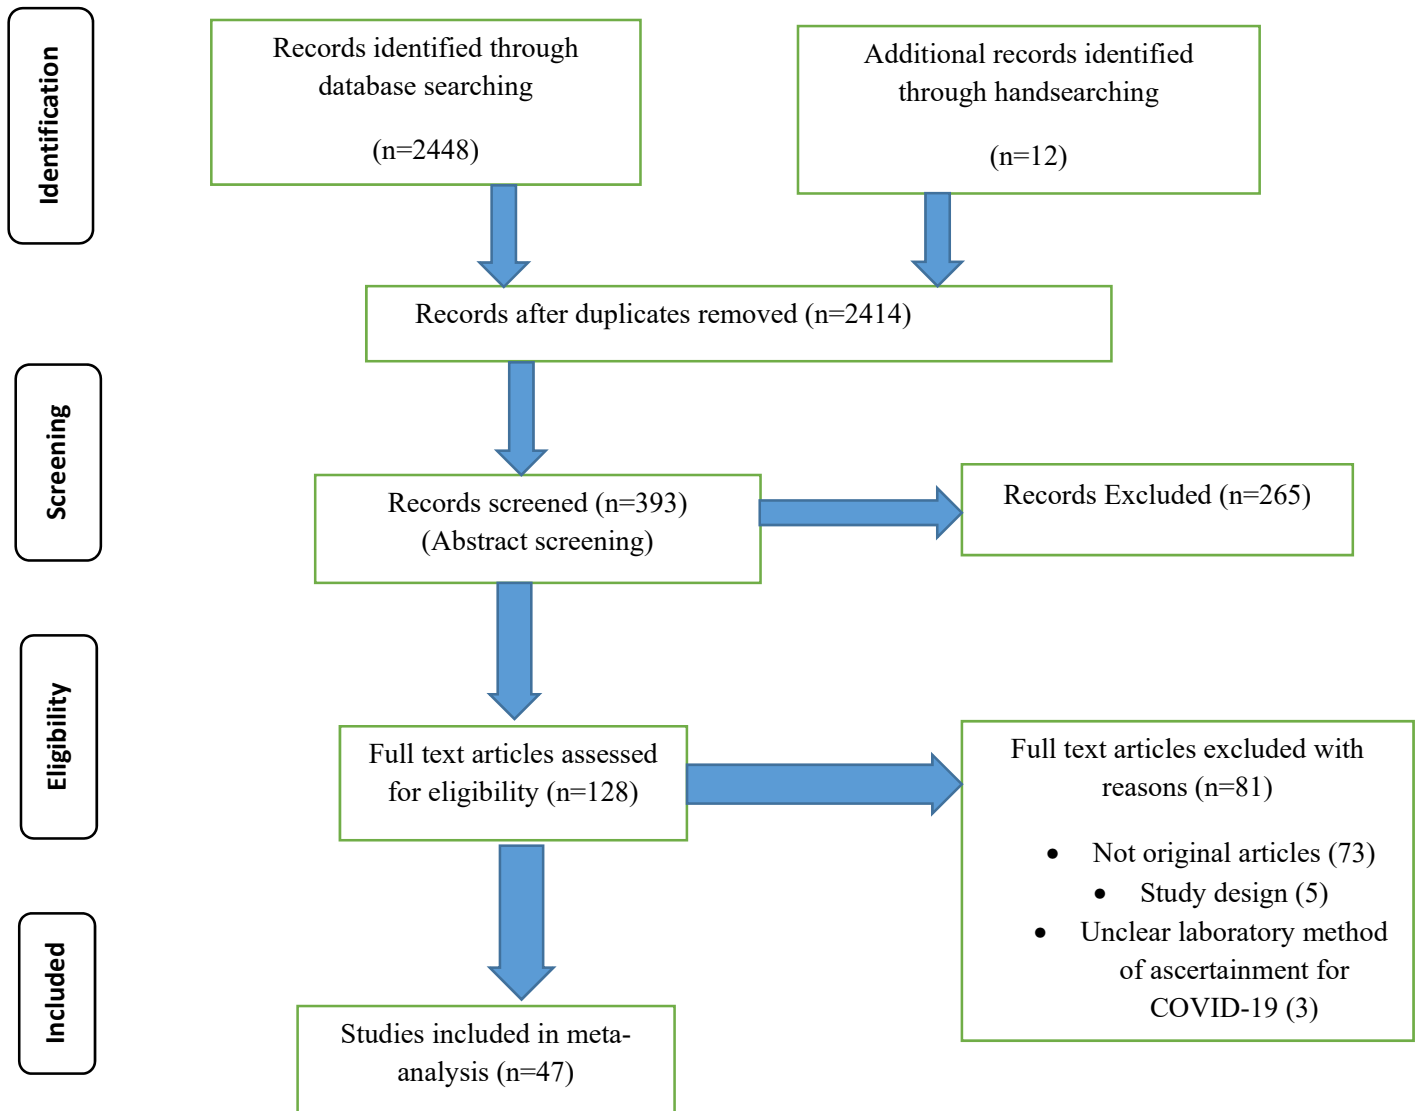

Supplement: s1 [file s1]
